# Supplementary material
Source: PubMed Central journal article supplement (PMC4607269)

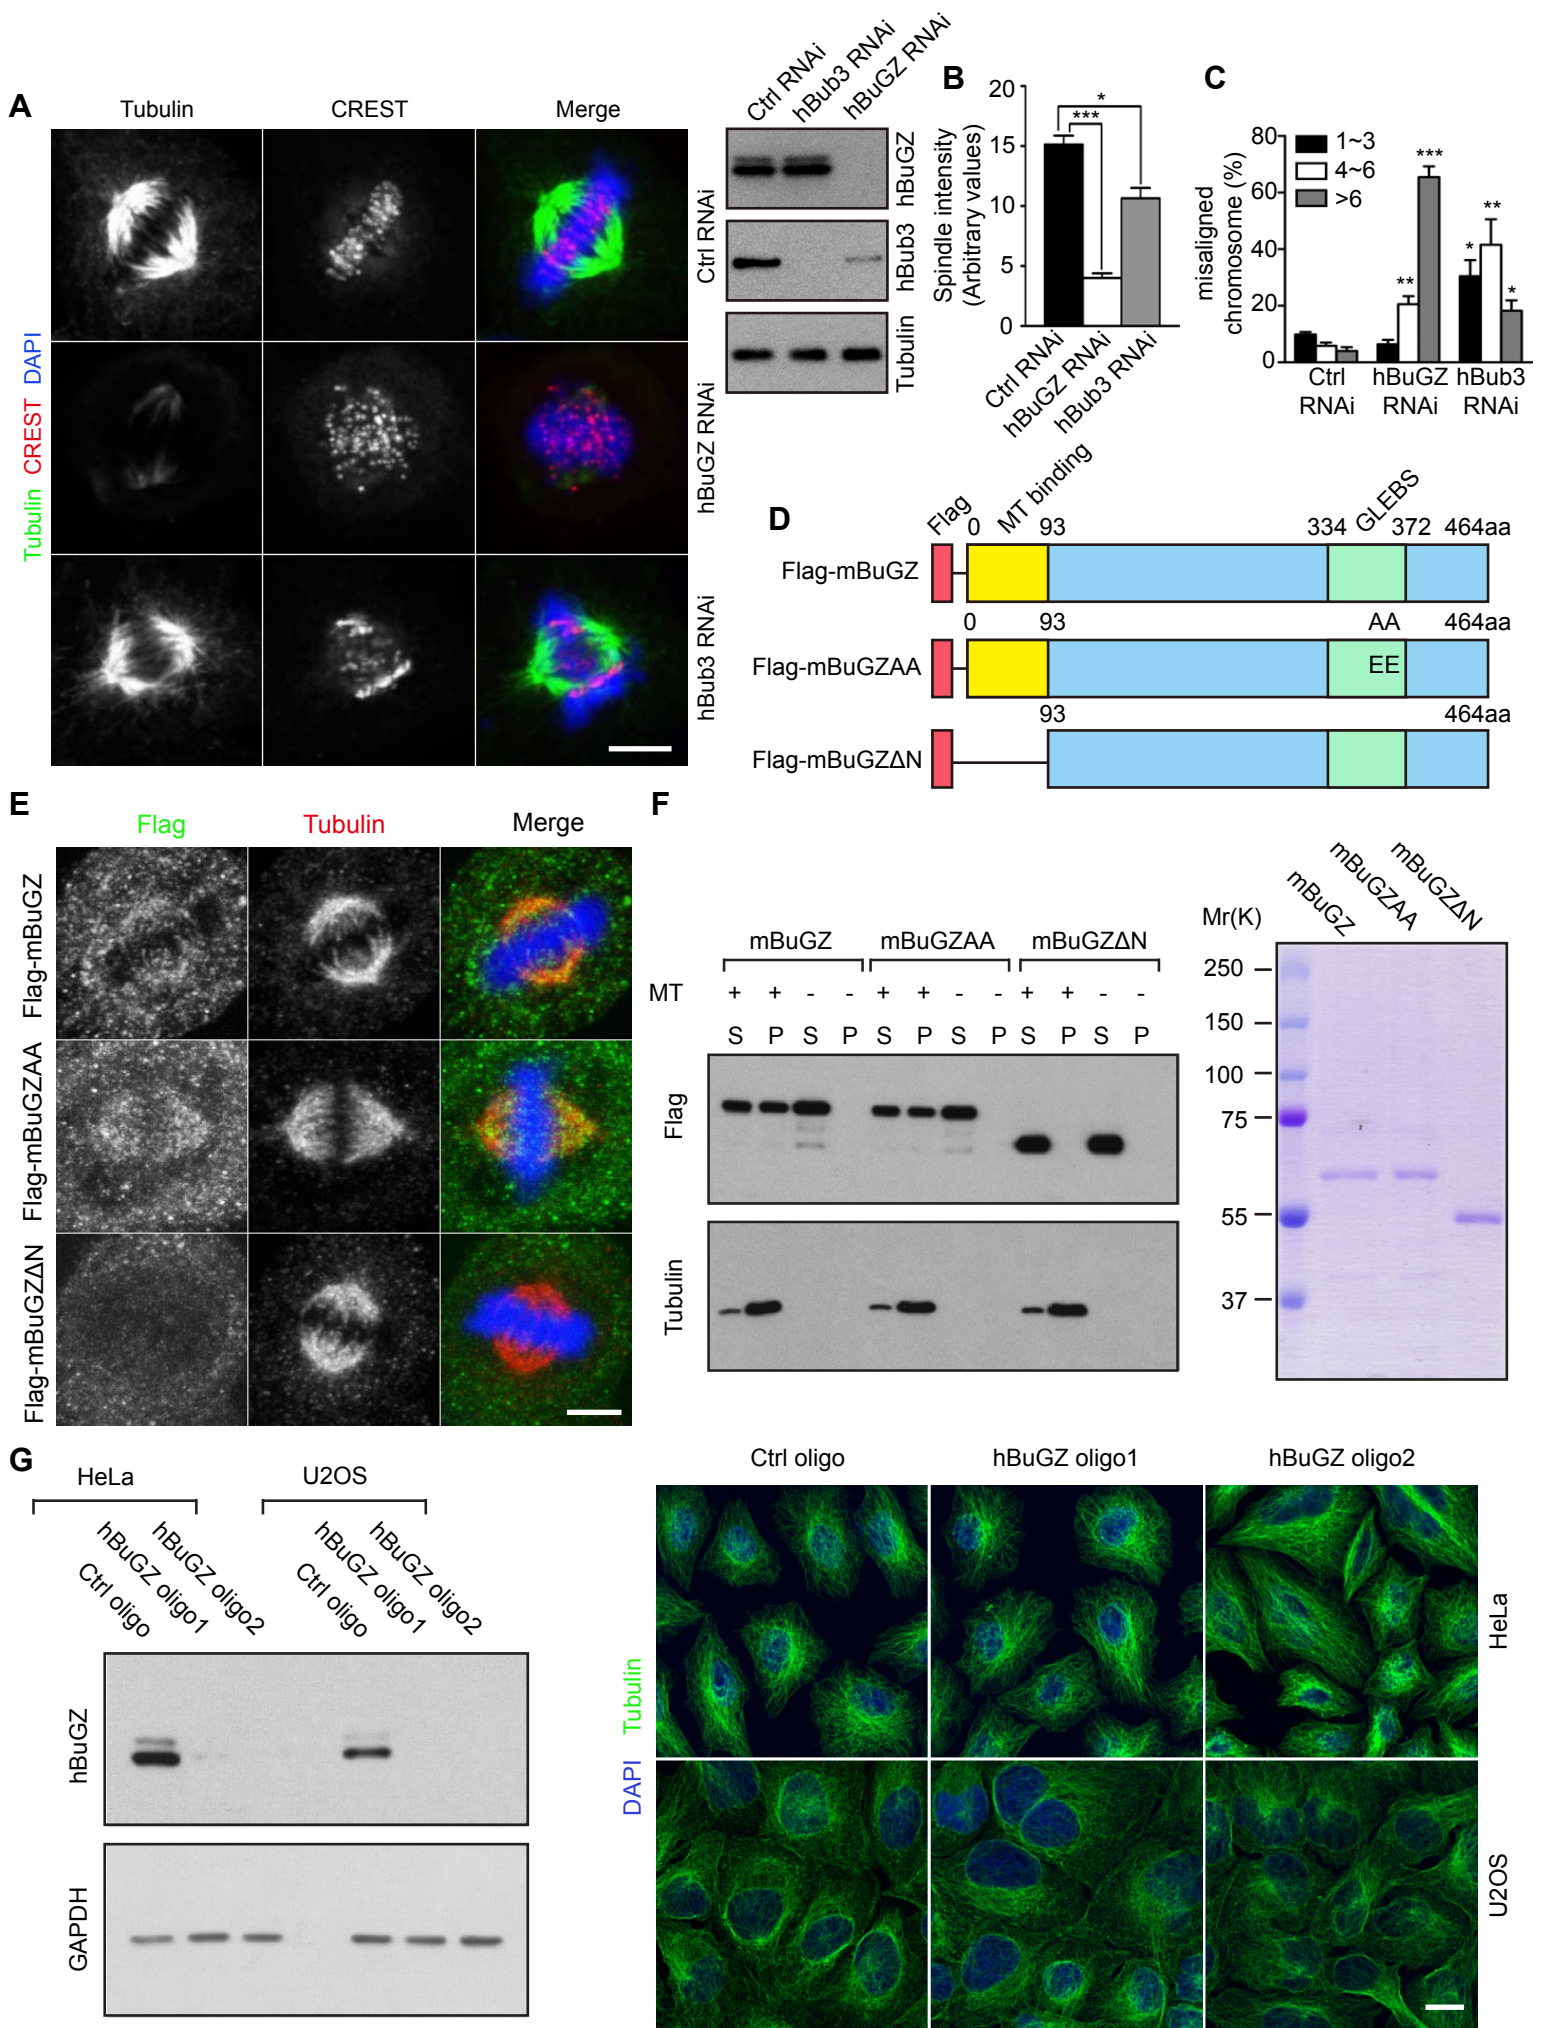

Supplement: NIHMS723823-supplement-1.pdf [file NIHMS723823-supplement-1.pdf]

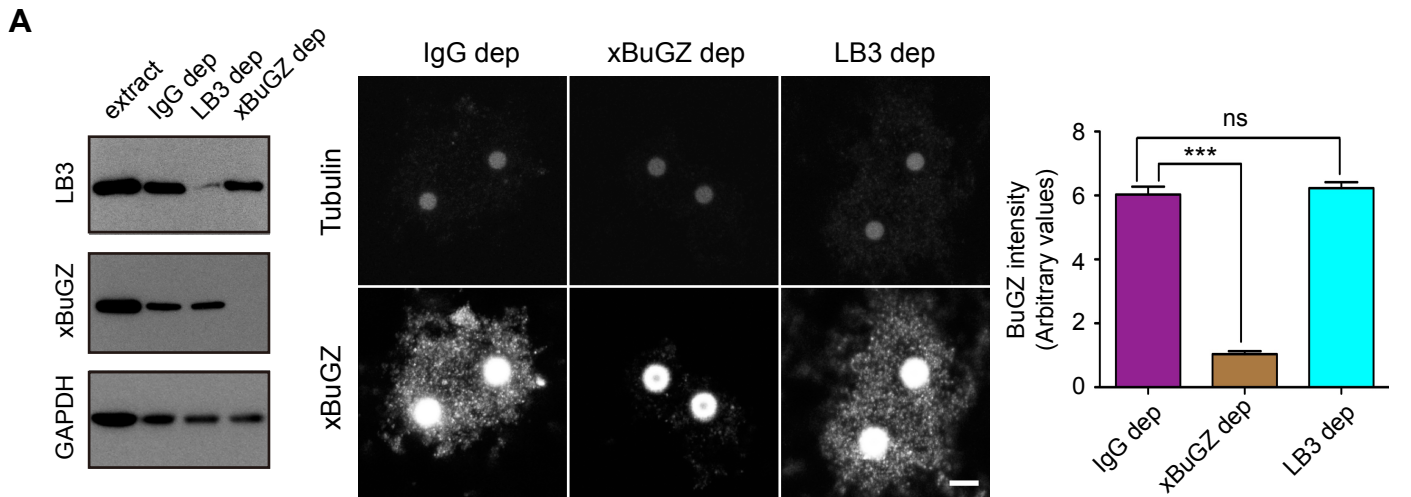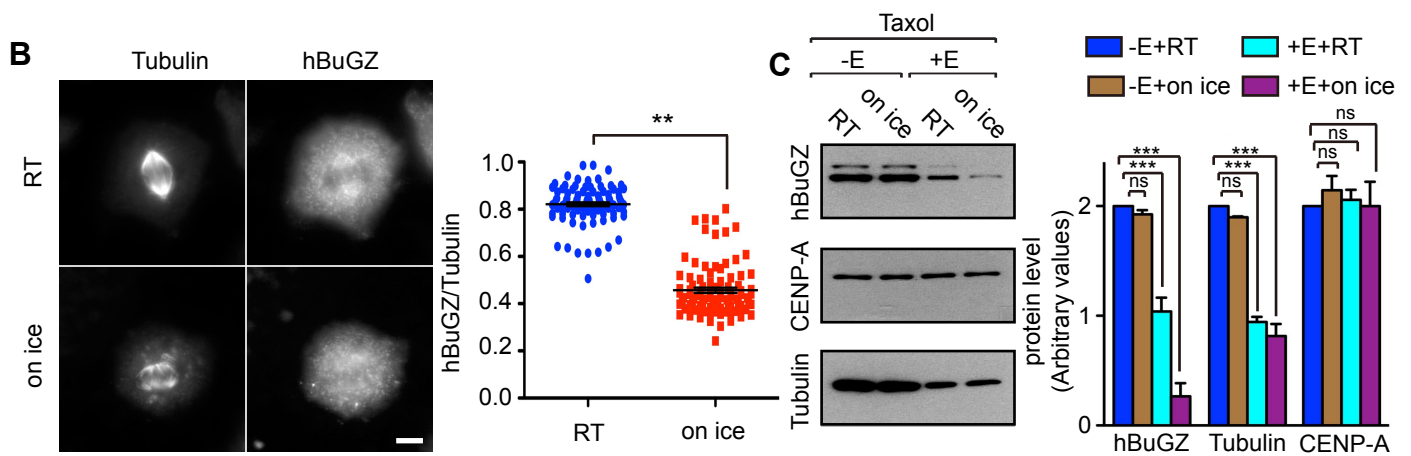

Supplement: NIHMS723823-supplement-2.pdf [file NIHMS723823-supplement-2.pdf]

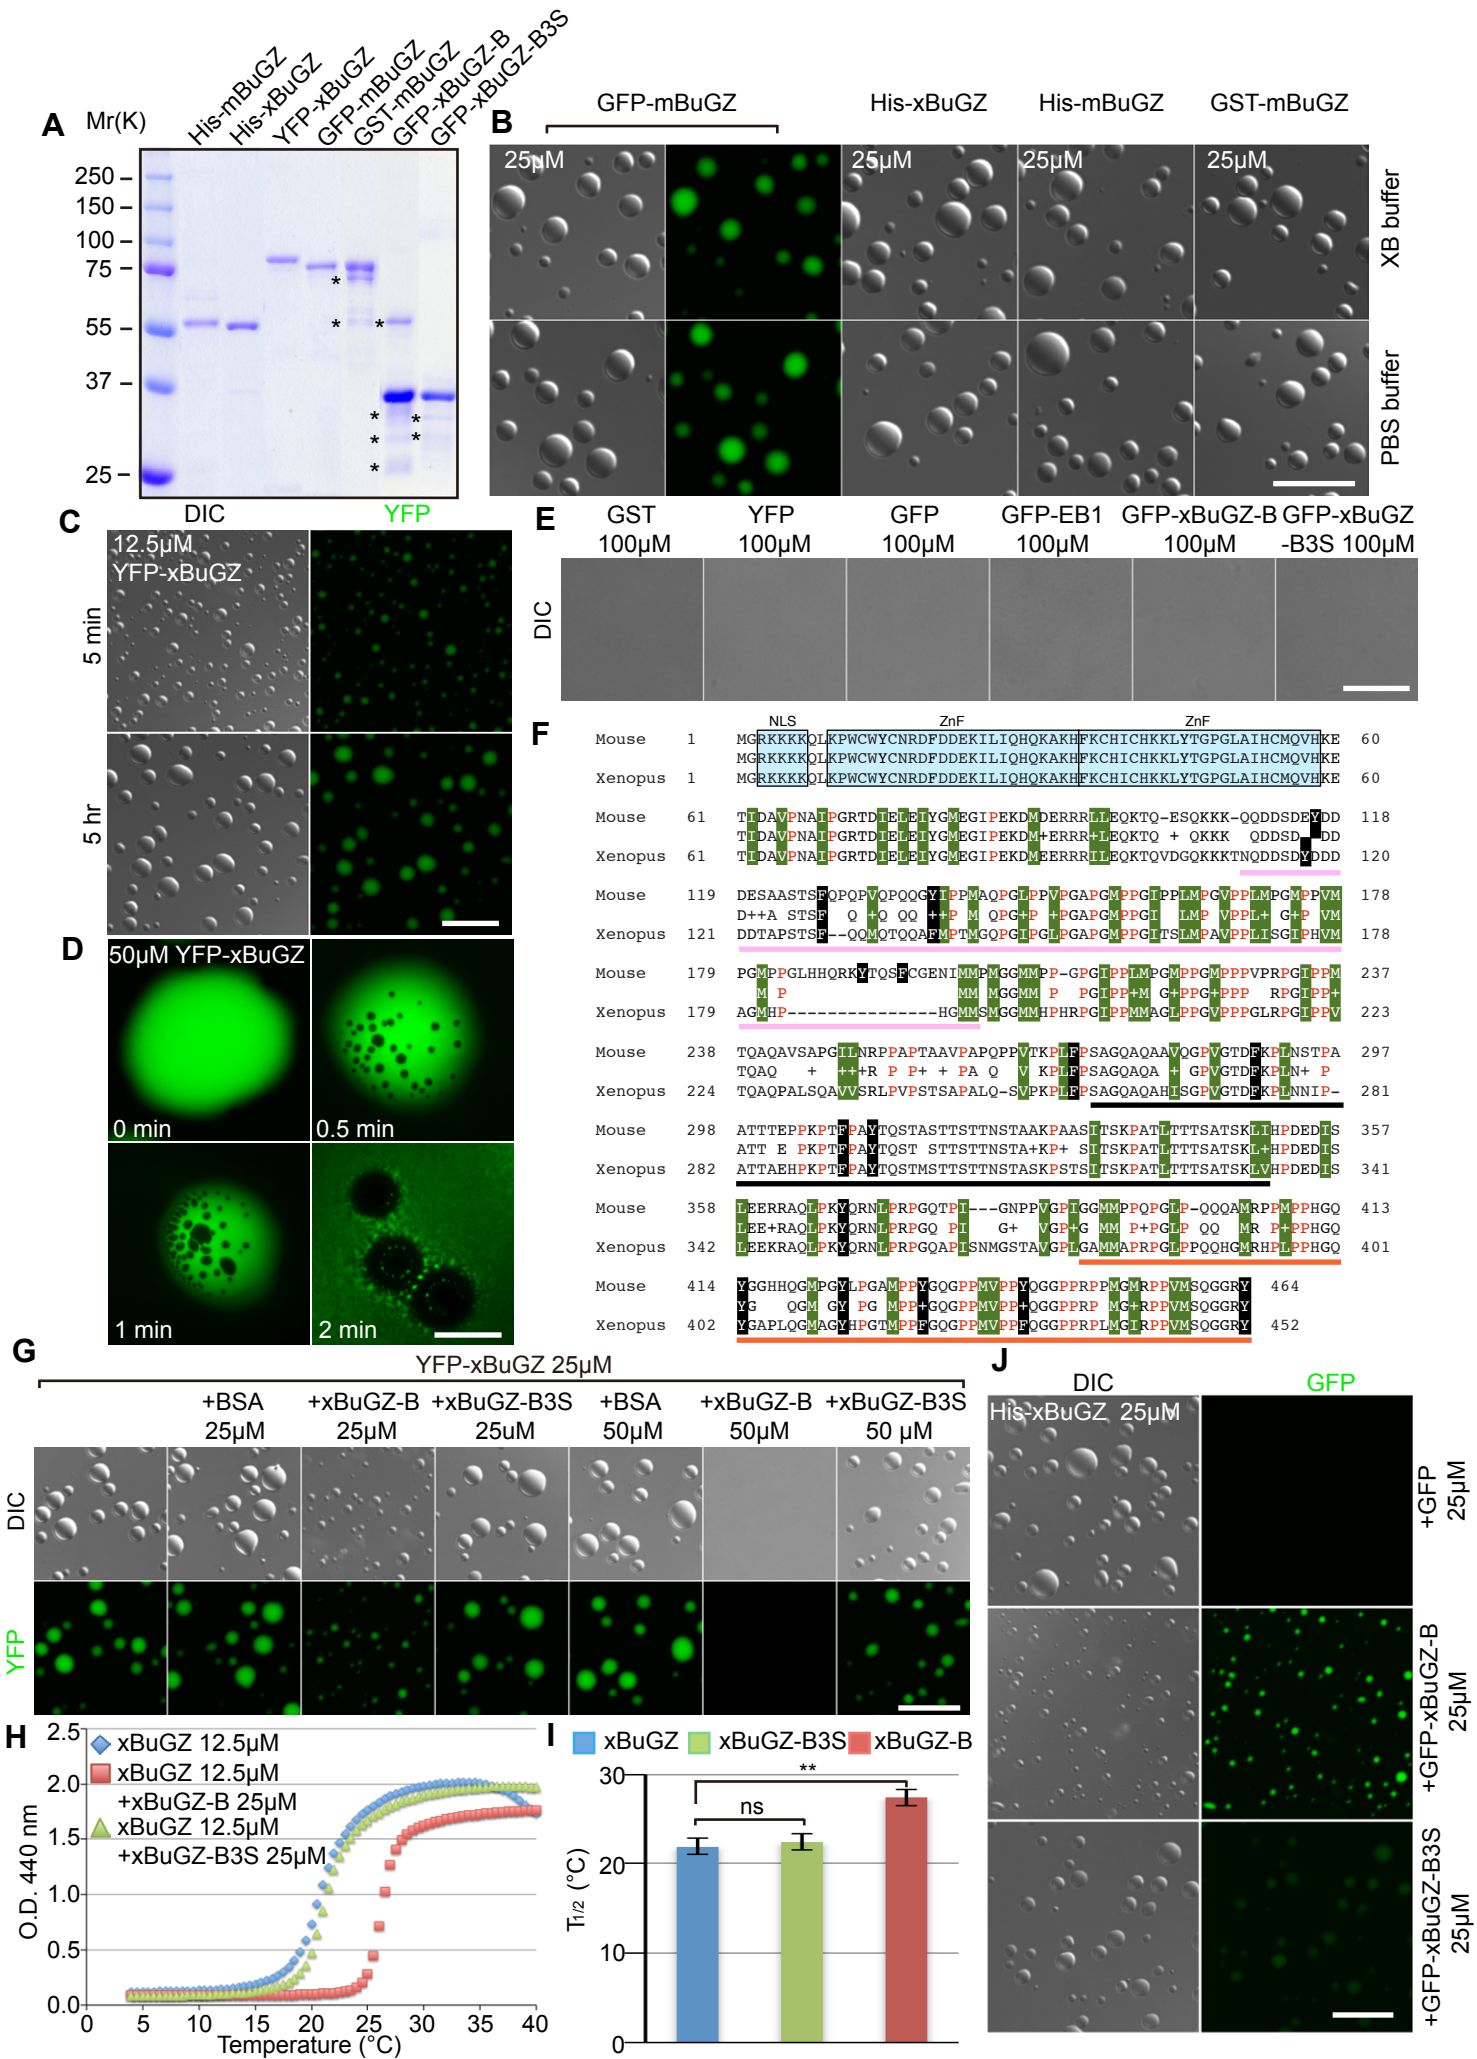

Supplement: NIHMS723823-supplement-3.pdf [file NIHMS723823-supplement-3.pdf]

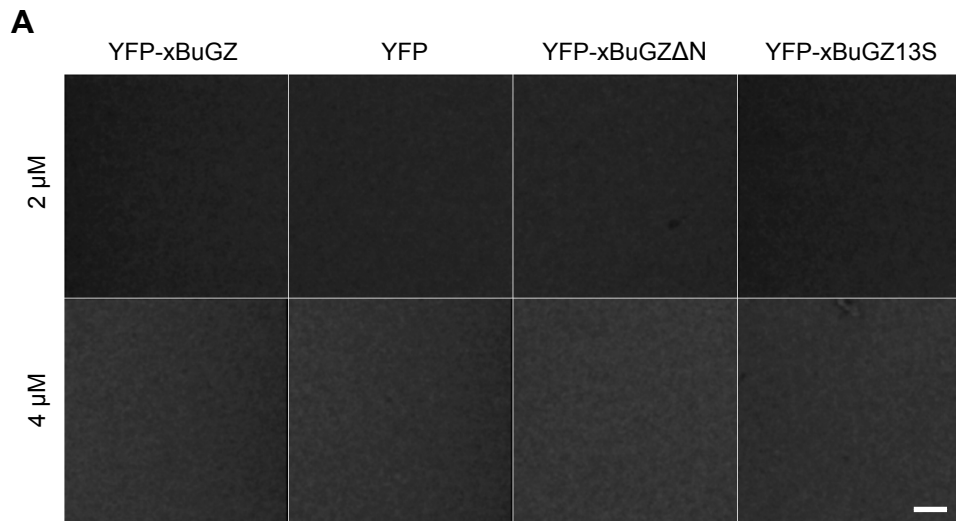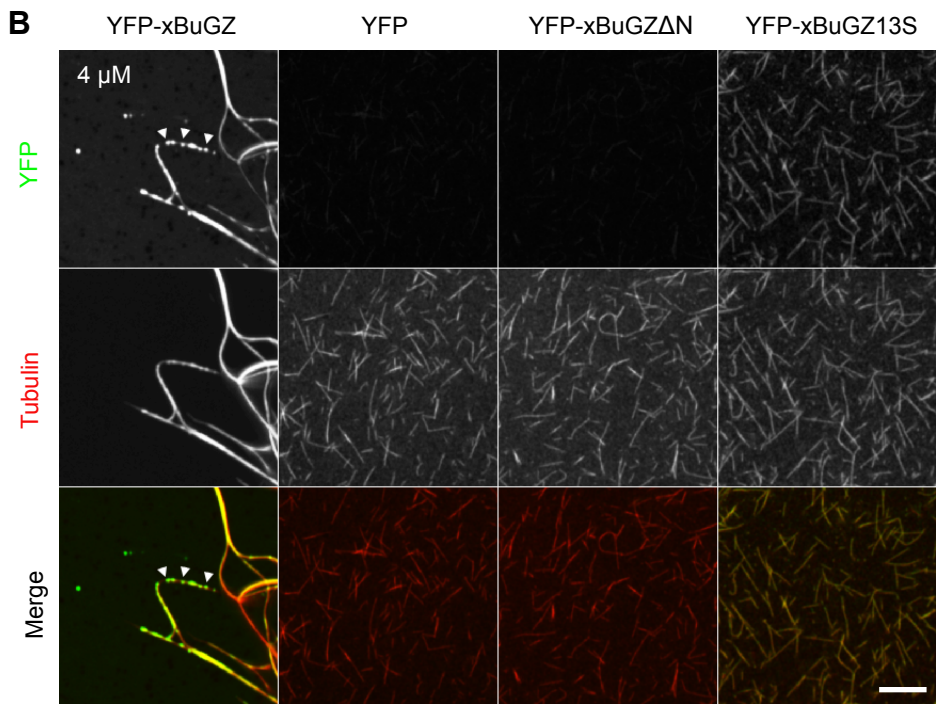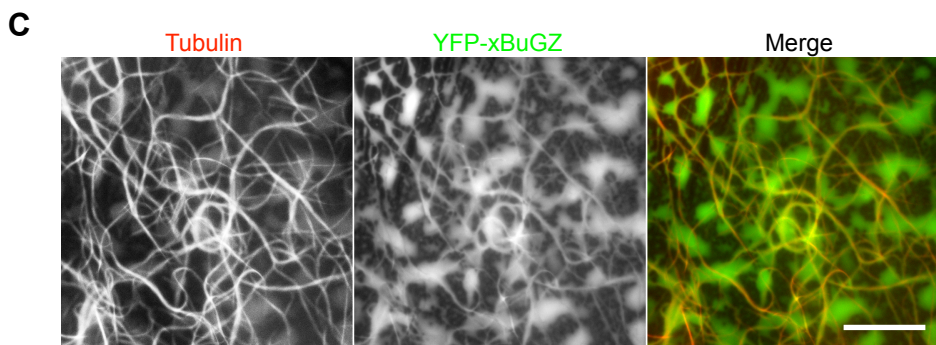

Supplement: NIHMS723823-supplement-4.pdf [file NIHMS723823-supplement-4.pdf]

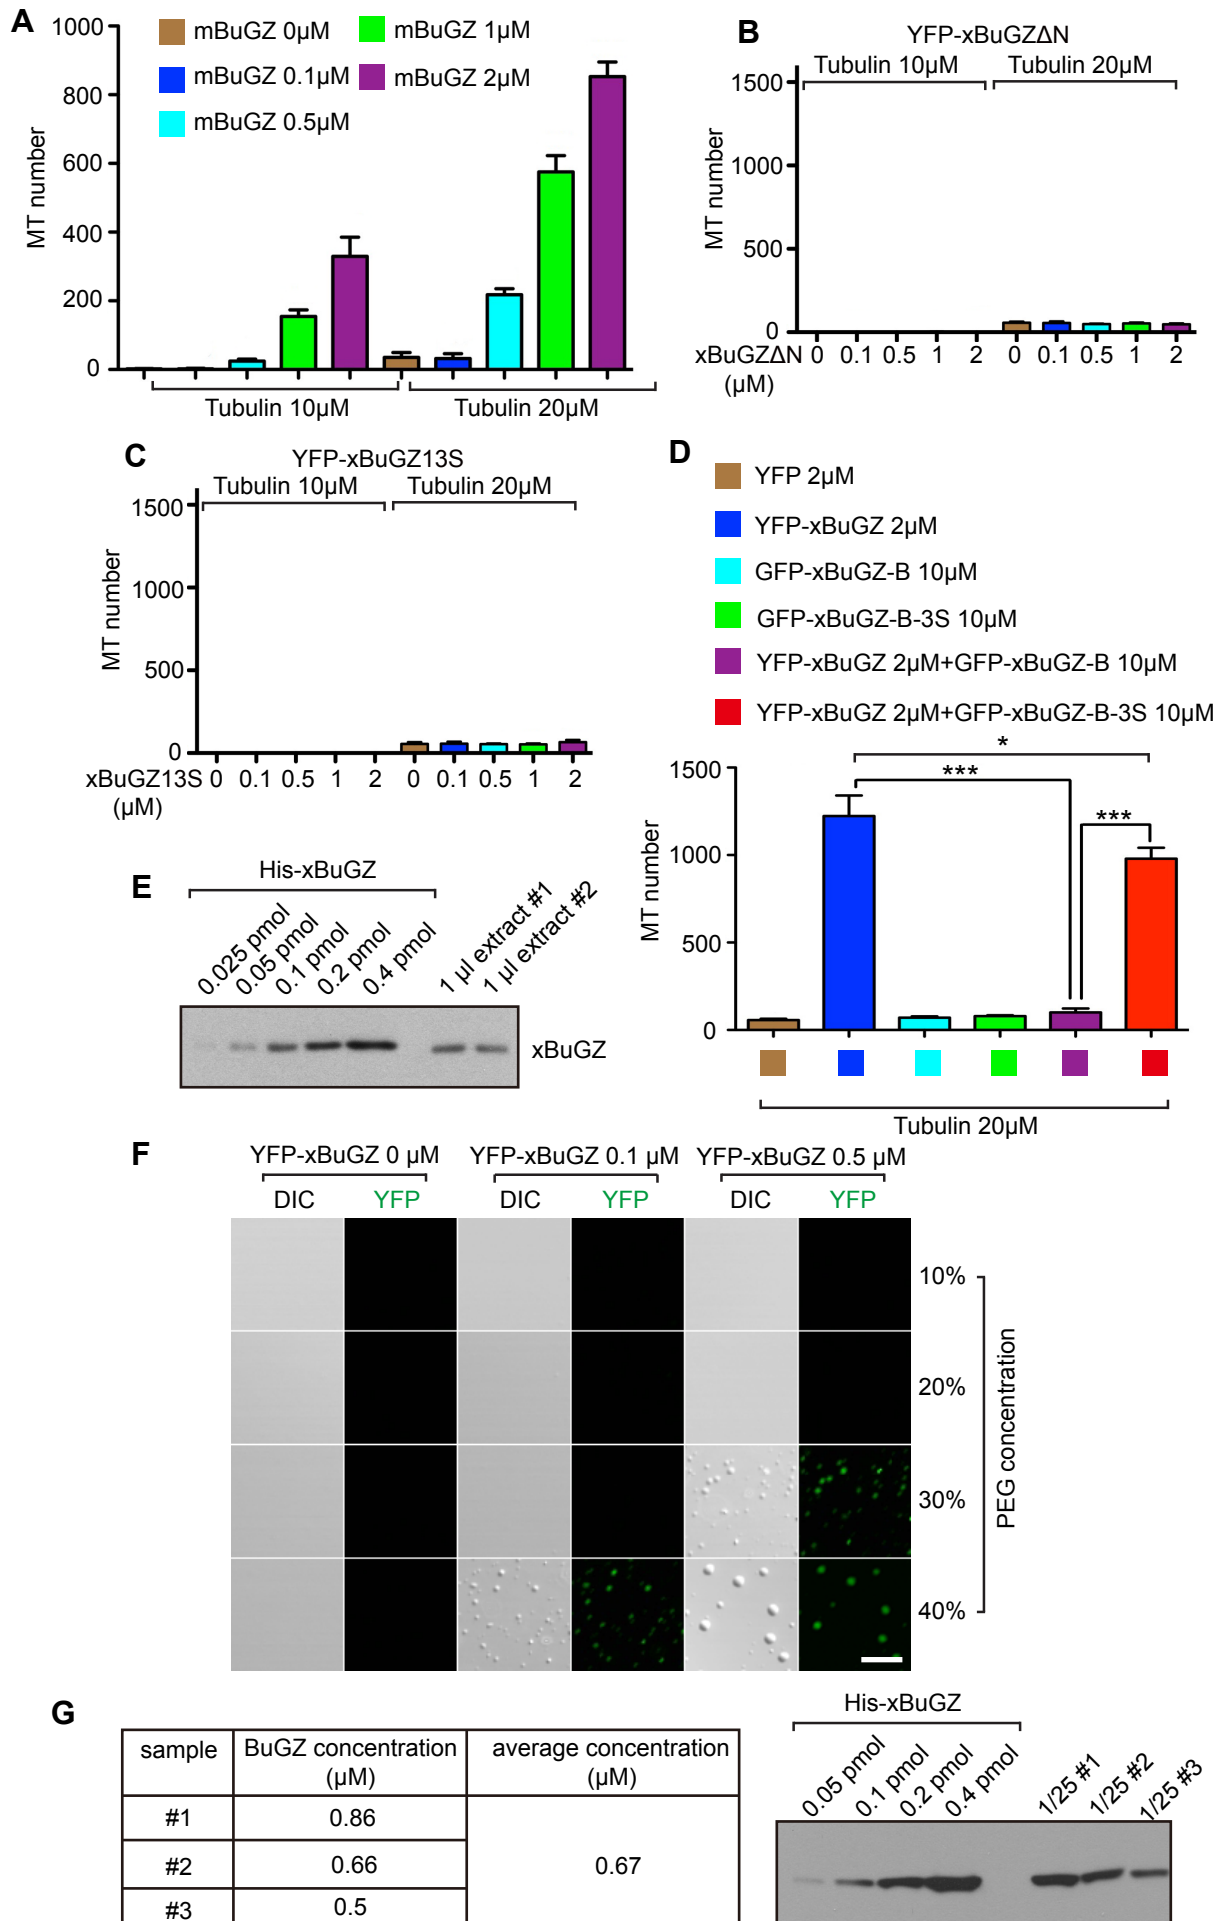

Supplement: NIHMS723823-supplement-5.pdf [file NIHMS723823-supplement-5.pdf]

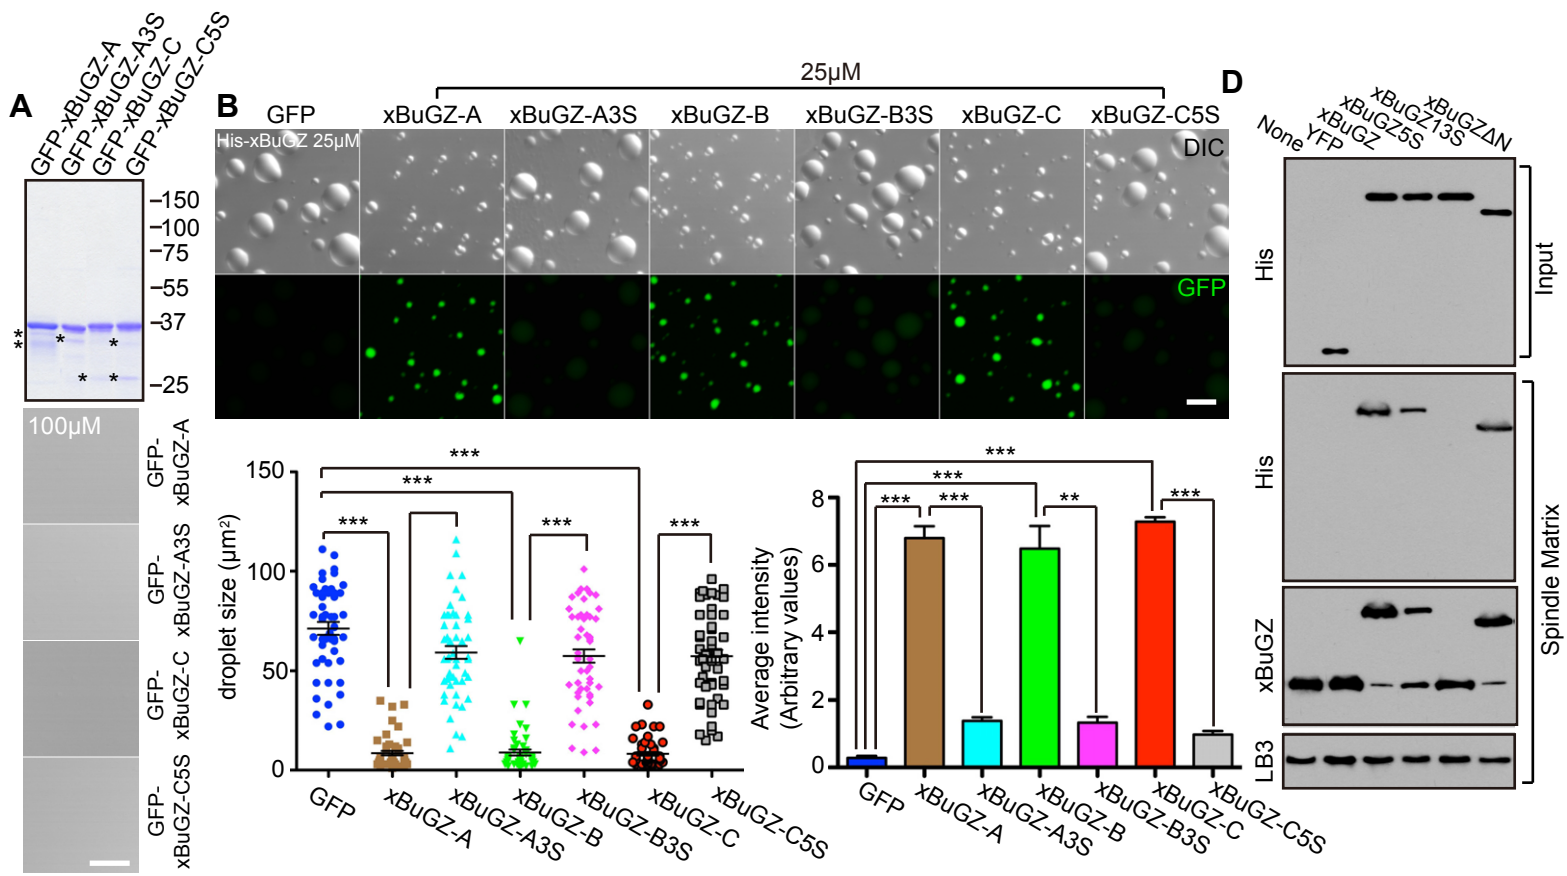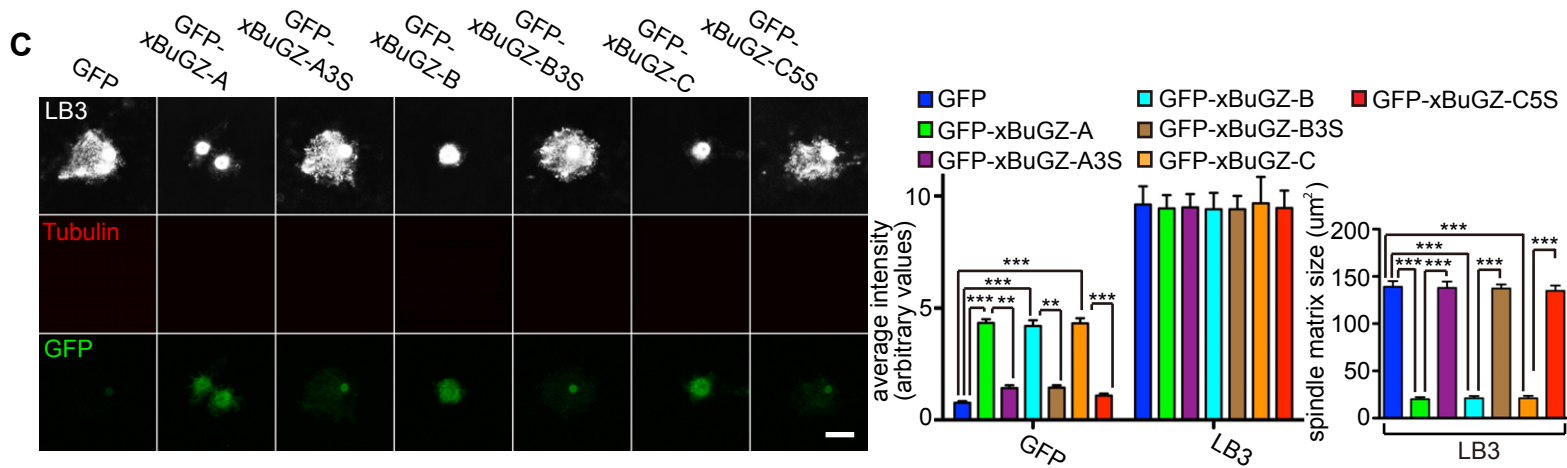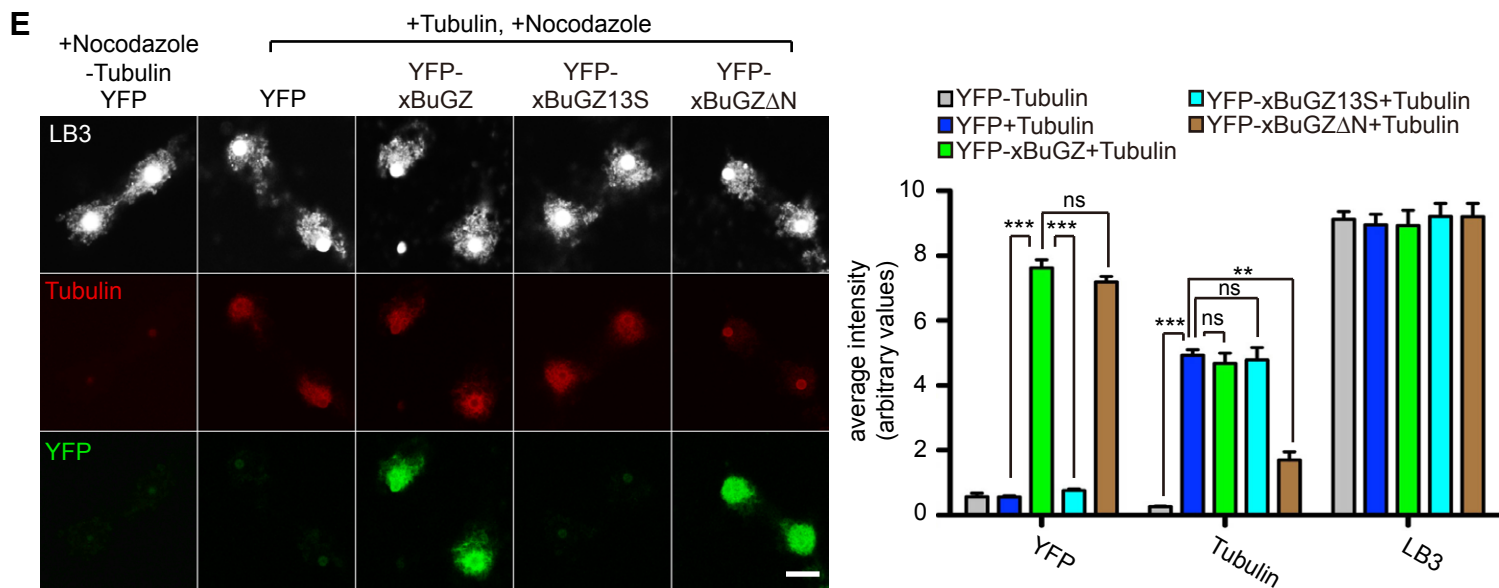

Supplement: NIHMS723823-supplement-6.pdf [file NIHMS723823-supplement-6.pdf]

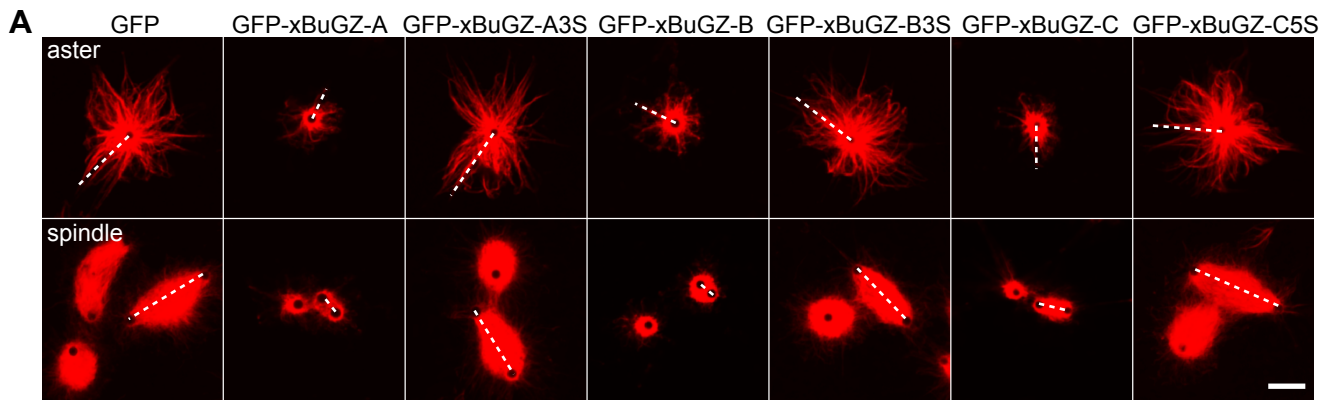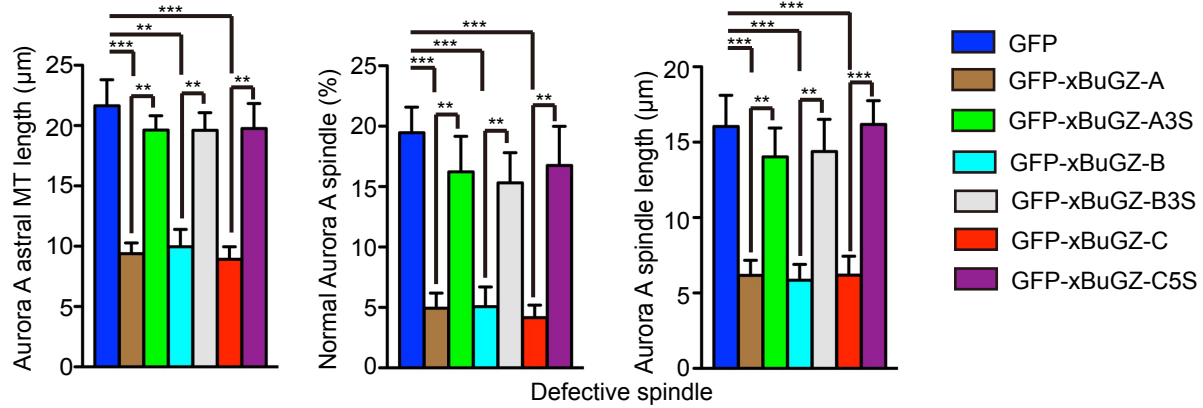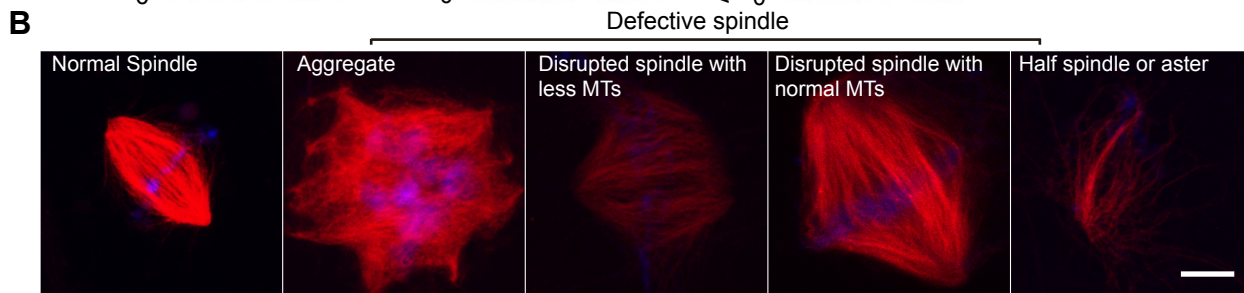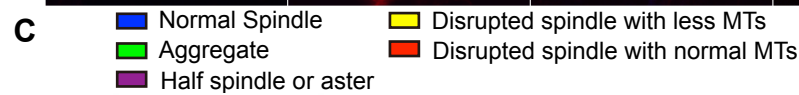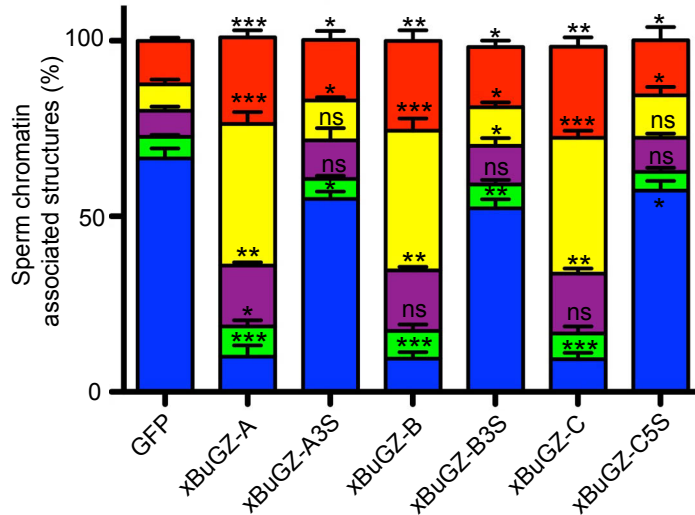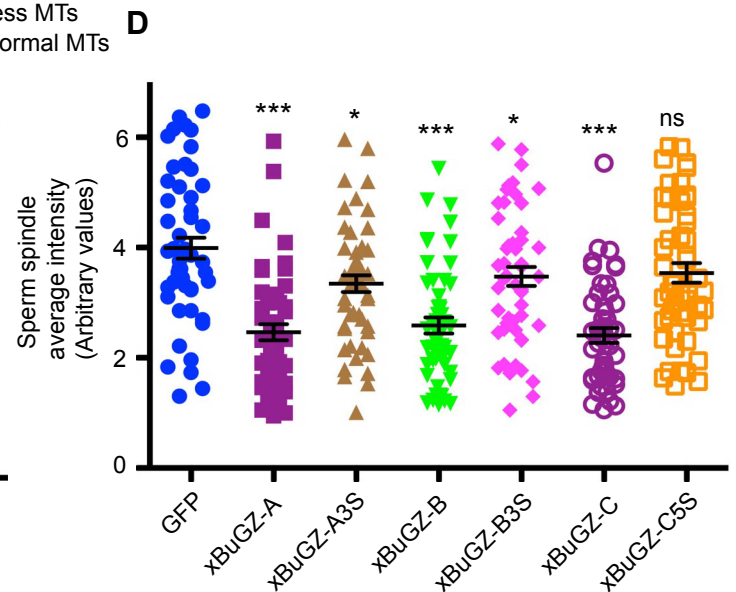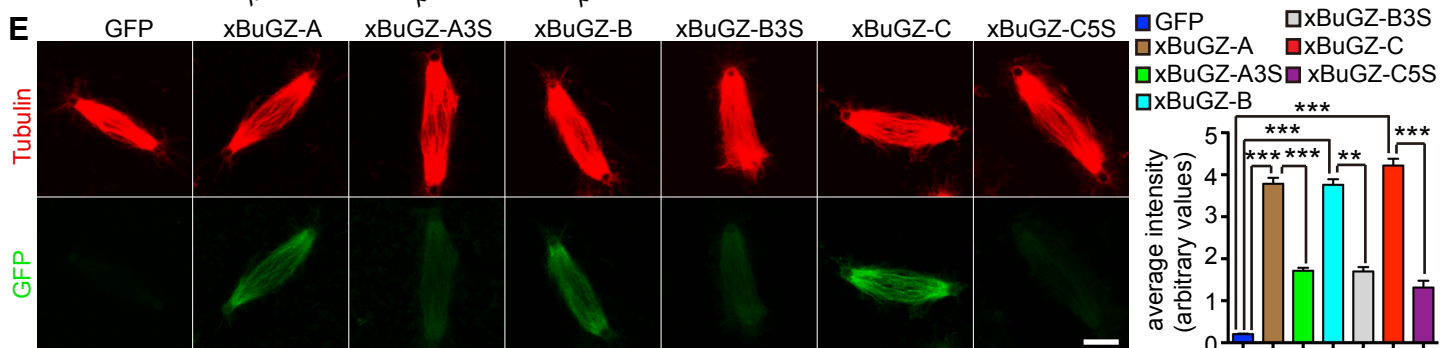

Supplement: NIHMS723823-supplement-7.pdf [file NIHMS723823-supplement-7.pdf]
